# Supplementary material for: Enhancement of visible photocatalytic performances of a Bi2MoO6–BiOCl nanocomposite with plate-on-plate heterojunction structure
Source: Royal Society of Chemistry journal article supplement (doi:10.1039/c4cp03865g), 2014-01-01
Supplement: c4cp03865g1.pdf [file c4cp03865g1.pdf]

## Supporting Information for

# Enhancement of Visible Photocatalytic Performances of Bi<sub>2</sub>MoO<sub>6</sub>-BiOCl nanocomposite with plate-on-plate Heterojunction Structure

Du Yue<sup>1</sup>, Daimei Chen<sup>1\*</sup>, Zhihong Wang<sup>1</sup>, Hao Ding<sup>1\*</sup>, Ruilong Zong<sup>2</sup>, Yongfa

Zhu<sup>2\*</sup>

*(<sup>1</sup>National Laboratory of Mineral Materials, School of Materials Sciences and  
Technology, China University of Geosciences, Beijing 100083, China*

<sup>2</sup>Department of Chemistry, Tsinghua University, Beijing, 100084, PR China)

\*Corresponding author.

Tel.: +86 15801558907; fax: +86 10 82322974.

<sup>1</sup> E-mail: chendaimei@cugb.edu.cn; [chendaimei0611.student@sina.com](mailto:chendaimei0611.student@sina.com);

E-mail: dinghao@cugb.edu.cn

<sup>2</sup> E-mail: [zhuyf@tsinghua.edu.cn](mailto:zhuyf@tsinghua.edu.cn)

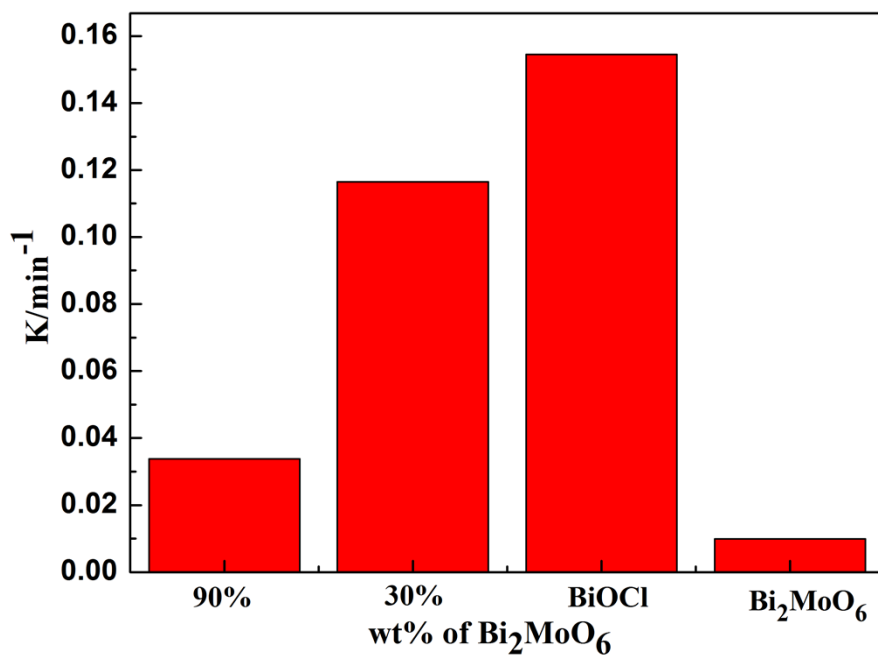

Figure S1 Apparent rate constants for the photocatalytic degradation RhB over BiOCl, Bi<sub>2</sub>MoO<sub>6</sub> and Bi<sub>2</sub>MoO<sub>6</sub>-BiOCl composites under UV light.

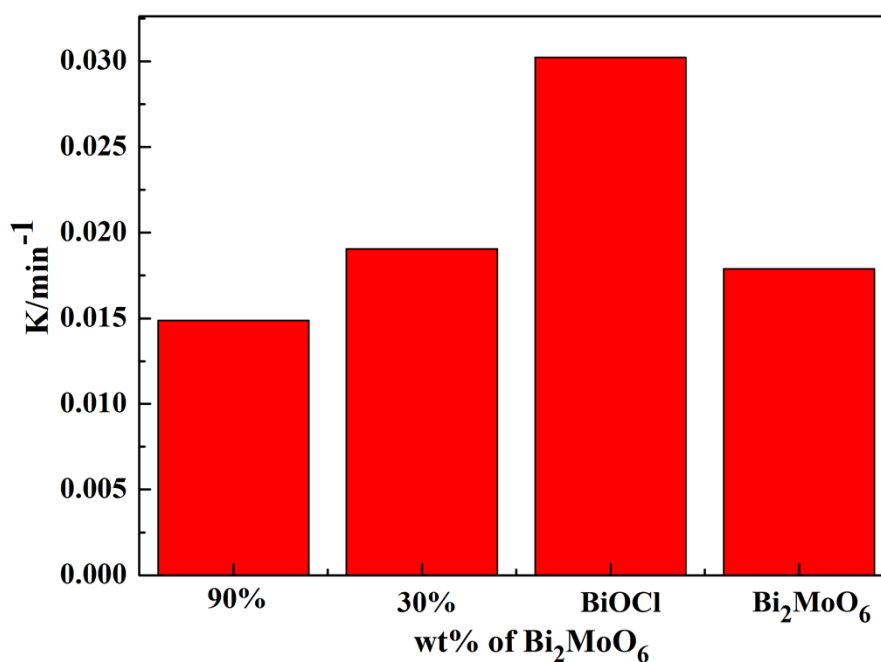

Figure S2 Apparent rate constants for the photocatalytic degradation phenol over BiOCl, Bi<sub>2</sub>MoO<sub>6</sub> and Bi<sub>2</sub>MoO<sub>6</sub>-BiOCl composites under UV light.

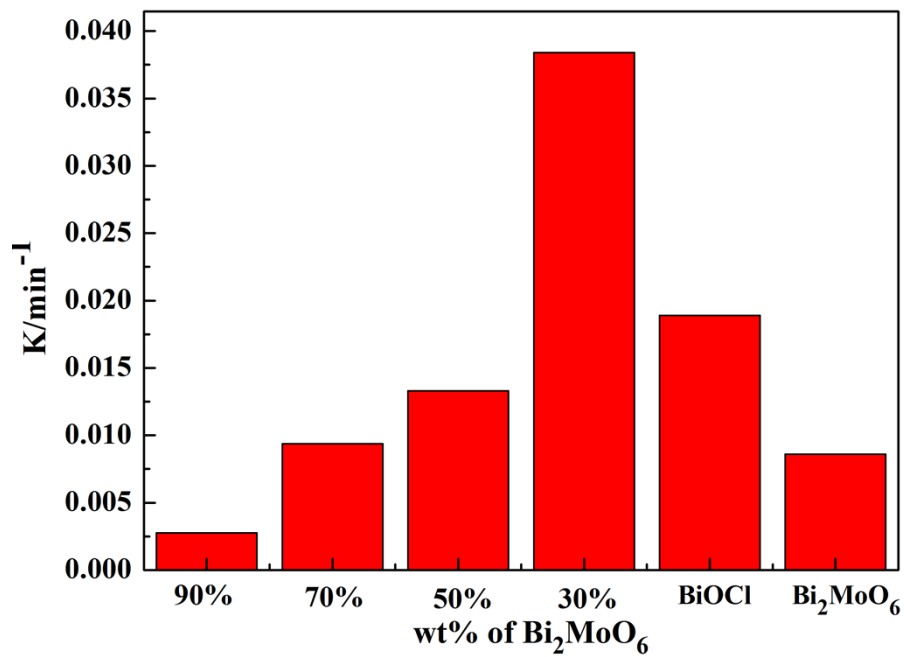

Figure S3 Apparent rate constants for the photocatalytic degradation RhB over BiOCl, Bi<sub>2</sub>MoO<sub>6</sub> and Bi<sub>2</sub>MoO<sub>6</sub>-BiOCl composites under UV-vis light.

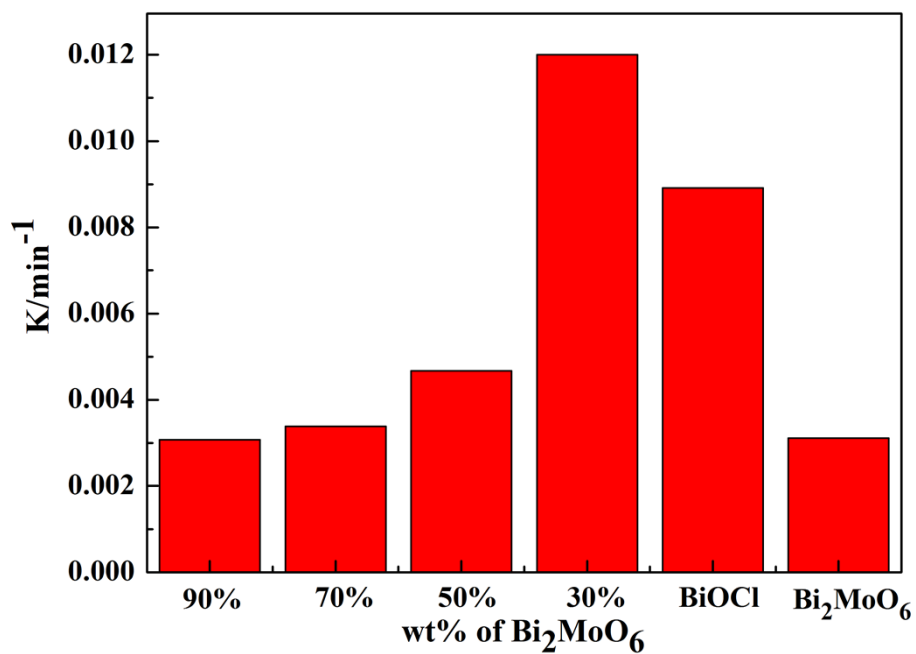

Figure S4 Apparent rate constants for the photocatalytic degradation phenol over BiOCl, Bi<sub>2</sub>MoO<sub>6</sub> and Bi<sub>2</sub>MoO<sub>6</sub>-BiOCl composites under UV-vis light.

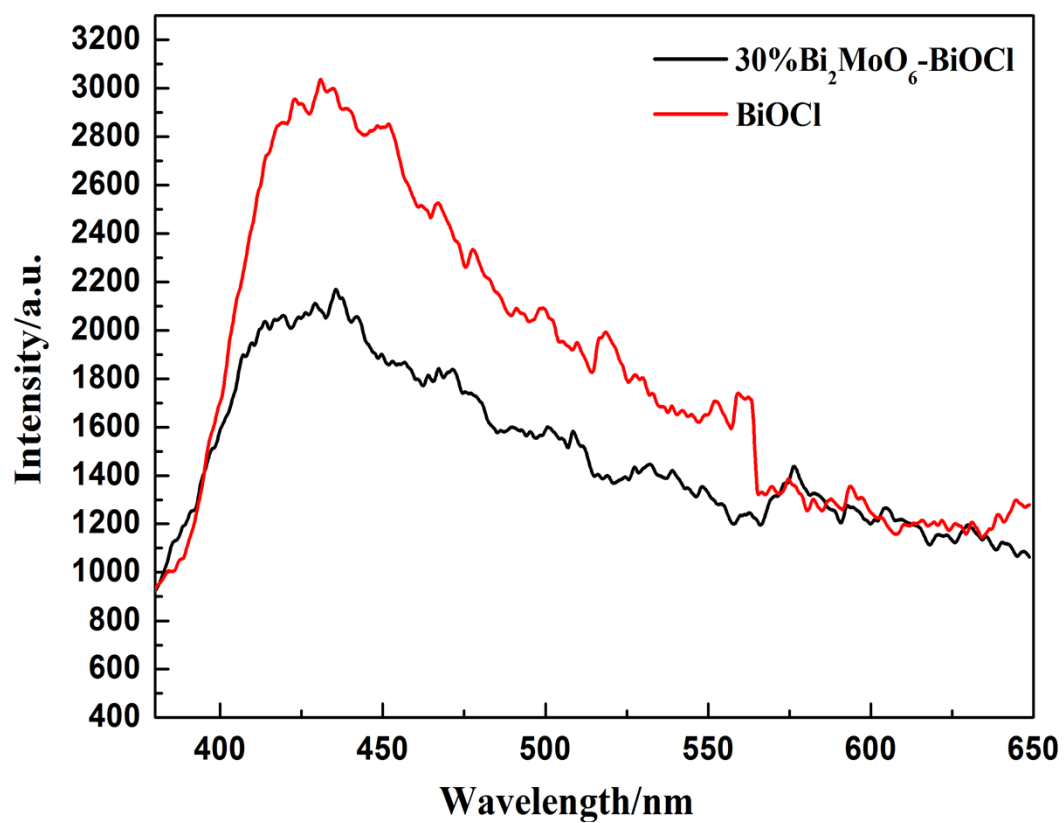

Fig S5 Photoluminescence (PL) spectra of BiOCl and 30% Bi<sub>2</sub>MoO<sub>6</sub>-BiOCl nanocomposite.
